# Supplementary material for: Liver sphingomyelin synthase 1 deficiency causes steatosis, steatohepatitis, fibrosis, and tumorigenesis: An effect of glucosylceramide accumulation
Source: PubMed Central journal article supplement — iScience. 2021 Nov 15;24(12):103449. doi: 10.1016/j.isci.2021.103449 (PMC8649732; doi:10.1016/j.isci.2021.103449), 2021-11-15

iScience, Volume 24

## **Supplemental information**

**Liver sphingomyelin synthase 1 deficiency causes  
steatosis, steatohepatitis, fibrosis, and tumorigenesis:  
An effect of glucosylceramide accumulation**

**Zhiqiang Li, Yeun-po Chiang, Mulin He, Tilla S. Worgall, Hongwen Zhou, and Xian-Cheng Jiang**

## Supplemental Tables and Figures

**Table S1. Primers for Real-time PCR, related to Figure 5F.**

|                      |                                                                                  |
|----------------------|----------------------------------------------------------------------------------|
| Mouse PDGFR $\alpha$ | Forward: 5'-TATCCTCCCAAACGAGAATGAGA-3'<br>Reverse: 5'-GTGGTTGTAGTAGCAAGTGTACC-3' |
| Mouse PDGFR $\beta$  | Forward: 5'-TTCCAGGAGTGATACCAGCTT-3'<br>Reverse: 5'-AGGGGGCGTGATGACTAGG-3'       |
| Mouse Colla1         | Forward: 5'-GCTCCTCTTAGGGGCCACT-3'<br>Reverse: 5'-CCACGTCTCACCATTGGGG-3'         |
| Mouse TIMP1          | Forward: 5'-GCAACTCGGACCTGGTCATAA-3'<br>Reverse: 5'-CGGCCCGTGATGAGAACT-3'        |
| Mouse Ccnd2          | Forward: 5'-GAGTGGGAACTGGTAGTGTG-3'<br>Reverse: 5'-CGCACAGAGCGATGAAGGT-3'        |
| Mouse Myct1          | Forward: 5'-ATGGCTAATAACACCACGAGC-3'<br>Reverse: 5'-CAGCGCCAGAGAAATCCT-3'        |
| Mouse TGF $\beta$ 1  | Forward: 5'-CTCCCGTGGCTTCTAGTGC-3'<br>Reverse: 5'-GCCTTAGTTTGACAGGATCTG-3'       |
| Mouse FSP27          | Forward: 5'-CAGAAGCCAACTAAGAAGATCG-3'<br>Reverse: 5'-TGTAGCAGTGCAGGTCATAG-3'     |
| Mouse CD36           | Forward: 5'-ATTGGTCAAGCCAGCT-3'<br>Reverse: 5'-TGTAGGCTCATCCACTAC-3'             |
| Mouse GAPDH          | Forward: 5'-AGGTCGGTGTGAACGGATTTG-3'<br>Reverse: 5'-TGTAGACCATGTAGTTGAGGTCA-3'   |
| Human PDGFR $\alpha$ | Forward: 5'-TGGCAGTACCCCATGTCTGAA-3'<br>Reverse: 5'-CCAAGACCGTCACAAAAGGC-3'      |
| Human PDGFR $\beta$  | Forward: 5'-AGCACCTTCGTTCTGACCTG-3'<br>Reverse: 5'-TATTCTCCCGTGTCTAGCCCA-3'      |
| Human Colla1         | Forward: 5'-GAGGGCCAAGACGAAGACATC-3'<br>Reverse: 5'-CAGATCACGTCATCGCACAAAC-3'    |
| Human TIMP1          | Forward: 5'-CTTCTGCAATTCCGACCTCGT-3'<br>Reverse: 5'-ACGCTGGTATAAGGTGGTCTG-3'     |
| Human Ccnd2          | Forward: 5'-ACCTTCCGCAGTGCTCCTA-3'<br>Reverse: 5'-CCCAGCCAAGAAACGGTCC-3'         |
| Human Myct1          | Forward: 5'-CAATCGGGCTGGTACTTGGAG-3'<br>Reverse: 5'-CGTGGGTGTAAGAAGACCTAGA-3'    |
| Human Mycn           | Forward: 5'-ACCCGGACGAAGATGACTTCT-3'<br>Reverse: 5'-CAGCTCGTTCTCAAGCAGCAT-3'     |
| Human TGF $\beta$ 1  | Forward: 5'-GGCCAGATCCTGTCCAAGC-3'<br>Reverse: 5'-GTGGGTTTCCACCATTAGCAC-3'       |
| Human SMS1           | Forward: 5'-TGTGCCGAGTCTCCTCTGA-3'<br>Reverse: 5'-CCGTTCTTGTGTGCTTCCAAA-3'       |
| Human SMS2           | Forward: 5'-CAAATTGCTATGCCCACTGAATC-3'<br>Reverse: 5'-GTTGTCAAGACGAGGTTGAAAAC-3' |

**Table S2. Description of human NASH samples, related to Figure 7.**

| Patient ID                  | Diagnosis | Gender | Ethnicity           | Age | Date     | Description |
|-----------------------------|-----------|--------|---------------------|-----|----------|-------------|
| 110048441                   | Normal    | Female | Non-Hispanic/Latino | 41  | 11/19/20 | Plasma      |
| 110040477                   | Normal    | Female | Non-Hispanic/Latino | 43  | 03/19/19 | Plasma      |
| 110027068                   | Normal    | Female | Non-Hispanic/Latino | 45  | 11/11/13 | Plasma      |
| 110032771                   | Normal    | Female | Non-Hispanic/Latino | 47  | 01/28/13 | Plasma      |
| 110039644                   | Normal    | Female | Non-Hispanic/Latino | 41  | 11/20/20 | Plasma      |
| 110046384                   | Normal    | Female | Non-Hispanic/Latino | 42  | 11/24/20 | Plasma      |
| 110046590                   | Normal    | Female | Non-Hispanic/Latino | 49  | 11/23/20 | Plasma      |
| 110032771                   | Normal    | Female | Non-Hispanic/Latino | 47  | 11/07/13 | Plasma      |
| EDP0000-AI900368145012020DD | NASH      | Female | Non-Hispanic/Latino | 60  | 01/20/20 | Plasma      |
| EDP0000-AI900420897073120DD | NASH      | Female | Non-Hispanic/Latino | 60  | 07/31/20 | Plasma      |
| LHP0000-AI900338336110719DD | NASH      | Female | Unknown             | 60  | 11/07/19 | Plasma      |
| LHP0000-AI900360896122419DD | NASH      | Female | Non-Hispanic/Latino | 48  | 12/24/19 | Plasma      |
| LHP0000-AI900368178011520DD | NASH      | Female | Unknown             | 49  | 01/15/20 | Plasma      |
| LHP0000-AI900371017020920DD | NASH      | Female | Non-Hispanic/Latino | 61  | 02/09/20 | Plasma      |
| LHP0000-AI900371343021220DD | NASH      | Female | Non-Hispanic/Latino | 61  | 02/12/20 | Plasma      |
| LHP0000-AI900385725031120DD | NASH      | Female | Non-Hispanic/Latino | 63  | 03/11/20 | Plasma      |

**Figure S1. Sphingolipid biosynthesis pathway.**

**Figure S2. SMS1 deficiency-mediated liver fibrosis.**

WT, *Sms2* KO, and *Sms1/Sms2* KO mouse liver sections were stained with trichrome for fibrosis. (A) Six-month-old and (B) one-year-old mice. The pictures are representative of six mice/group.

**Figure S3. SMS1 deficiency-mediated liver tumor formation.**

Liver tumor observations in 1-year-old WT, *Sms2* KO, and *Sms1/Sms2* KO mice. The pictures are representative of six mice/group.

**Figure S4. Mouse liver S1P measurement.** Using LC/MS/MS, S1P was measured in livers from 6-month-old WT, *Sms2* KO, and *Sms1/Sms2* KO mice. Data are represented as mean  $\pm$  SD, n=5.

**Figure S5. Scatter Plot of RNA sequencing.** WT hepatocytes vs. *Sms1/Sms2* KO hepatocytes.

Figure S1. Li et al

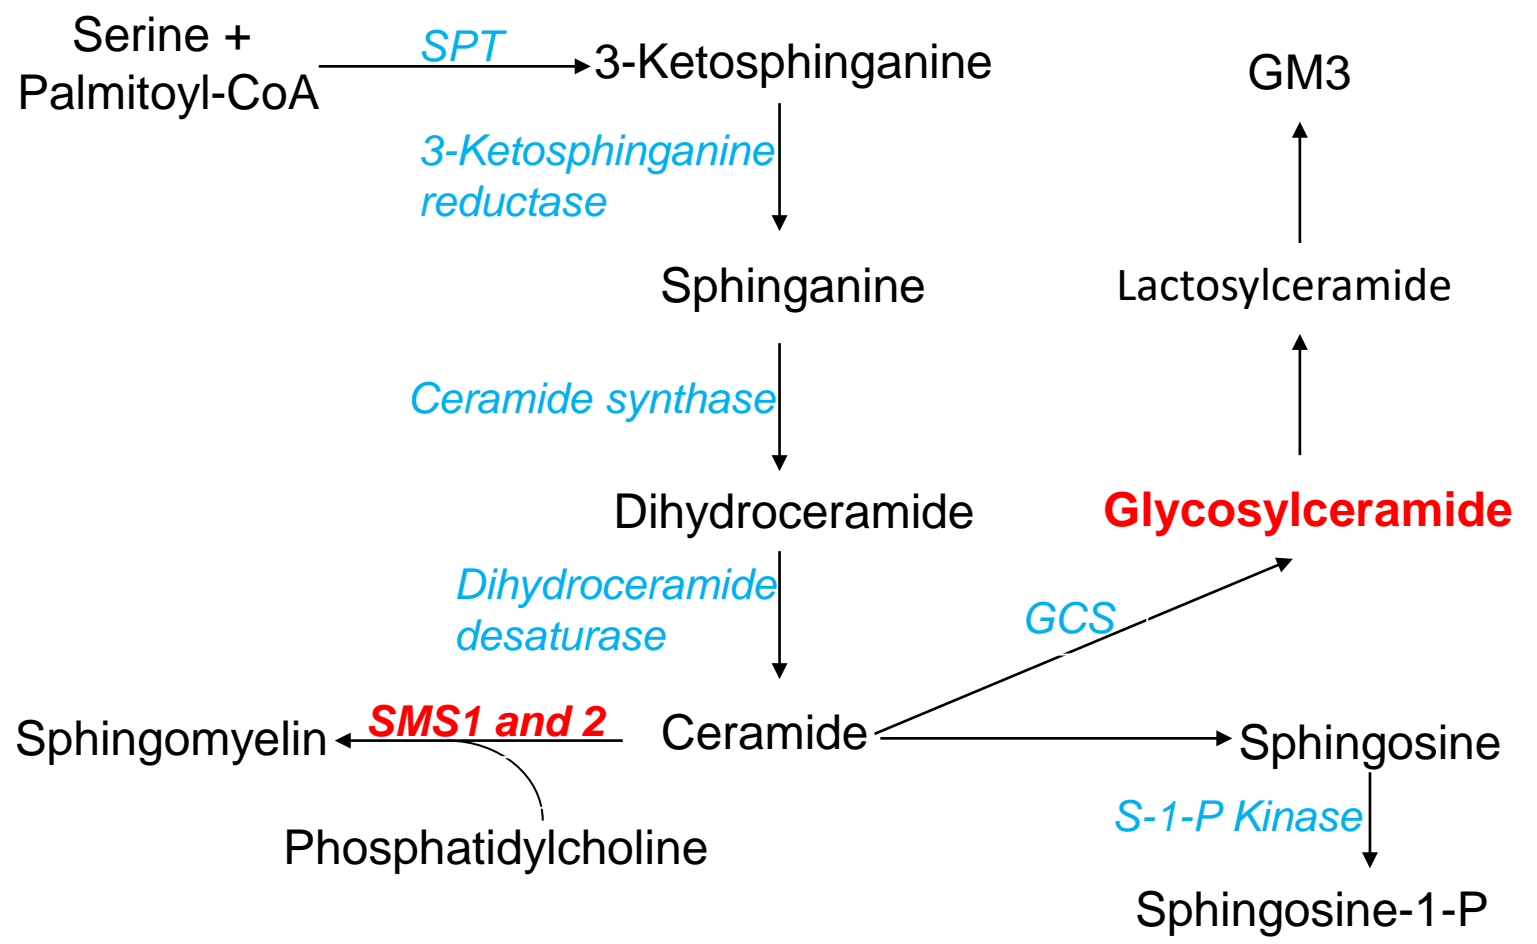

Figure S2. Li et al

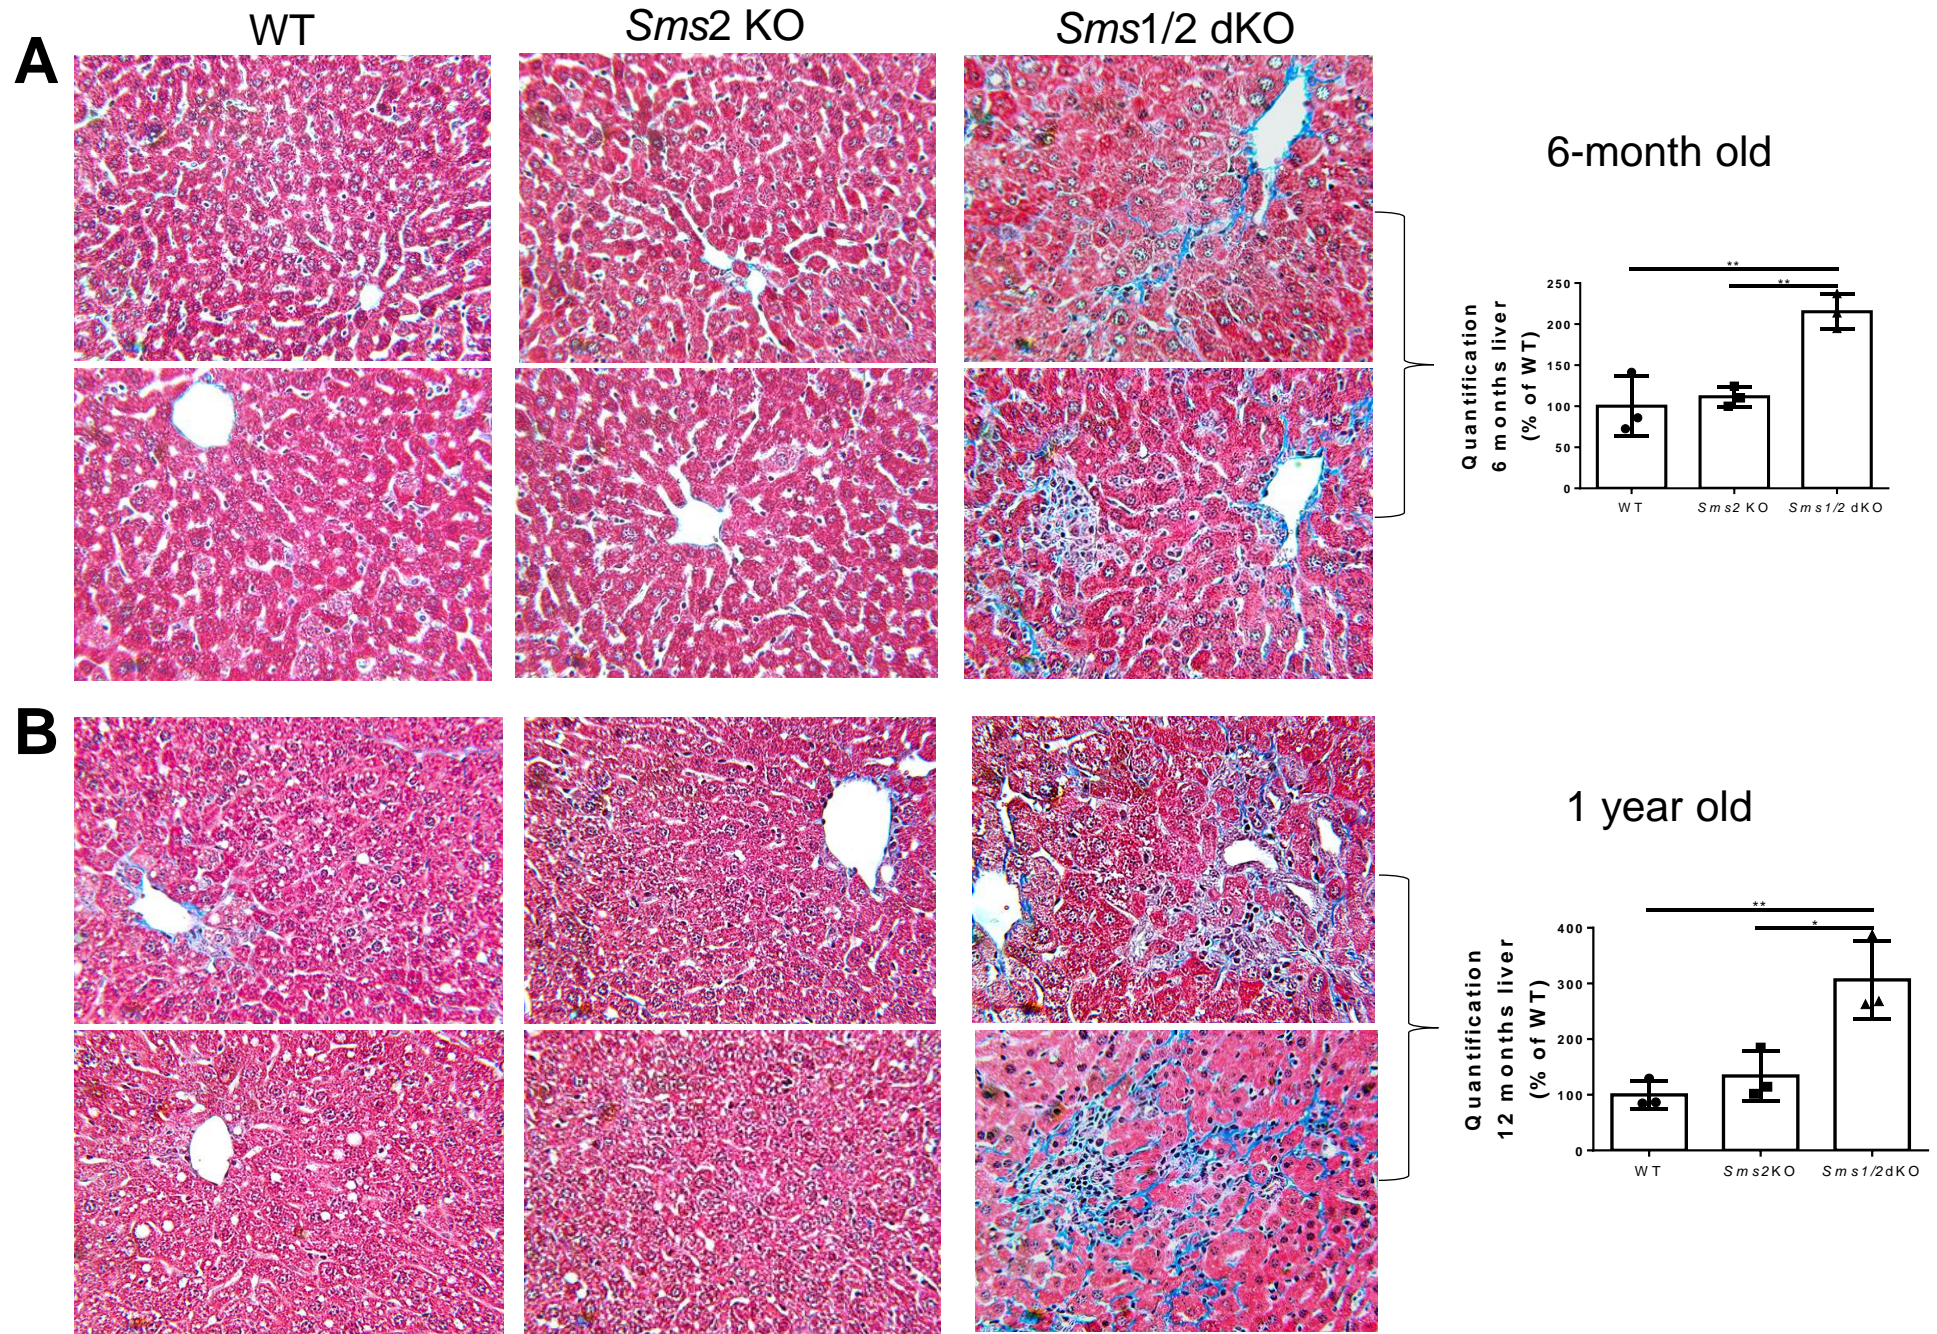

Figure S3. Li et al

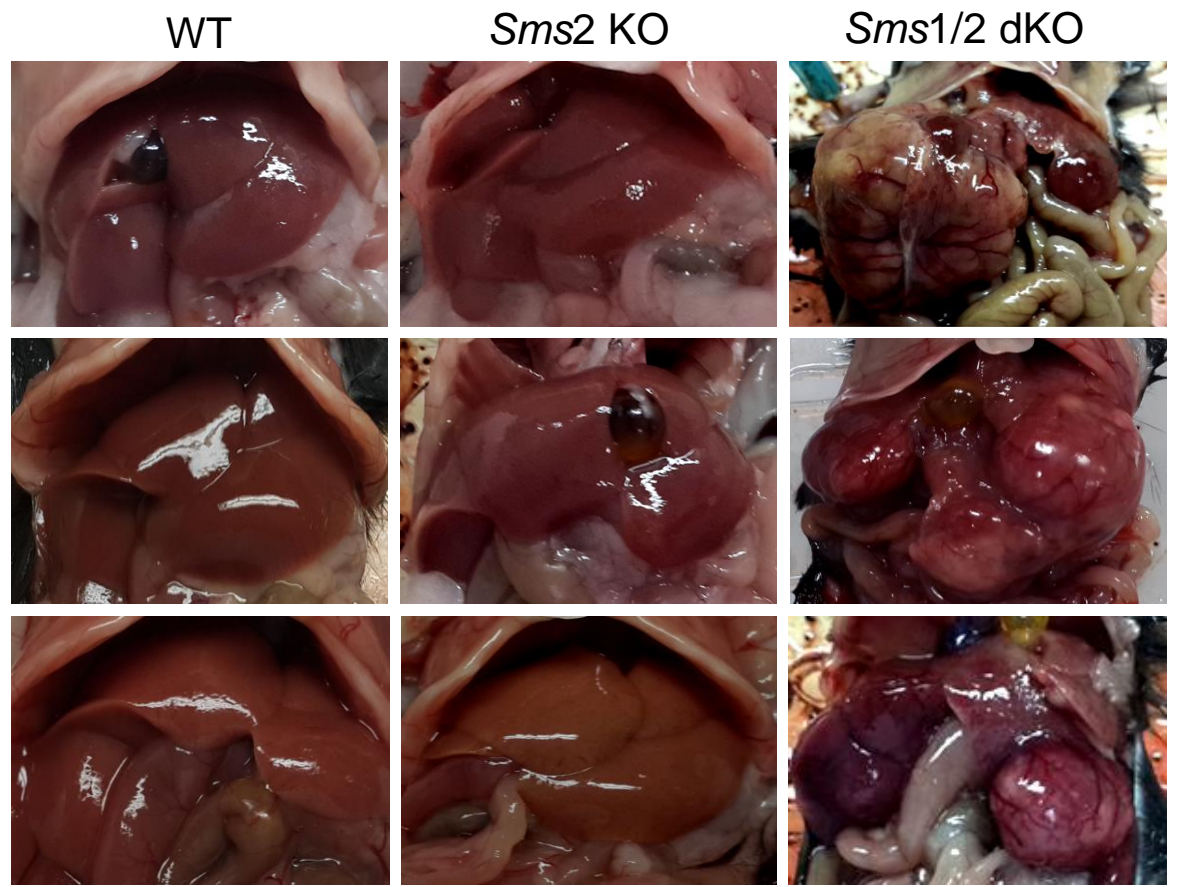

Figure S4. Li et al

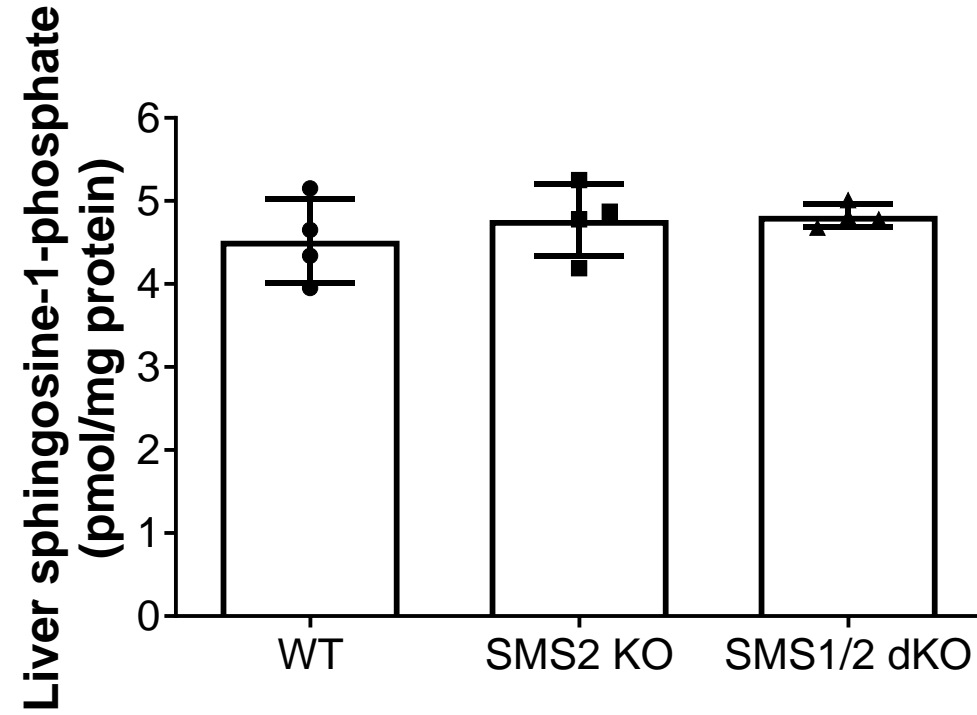



Figure S5. Li et al

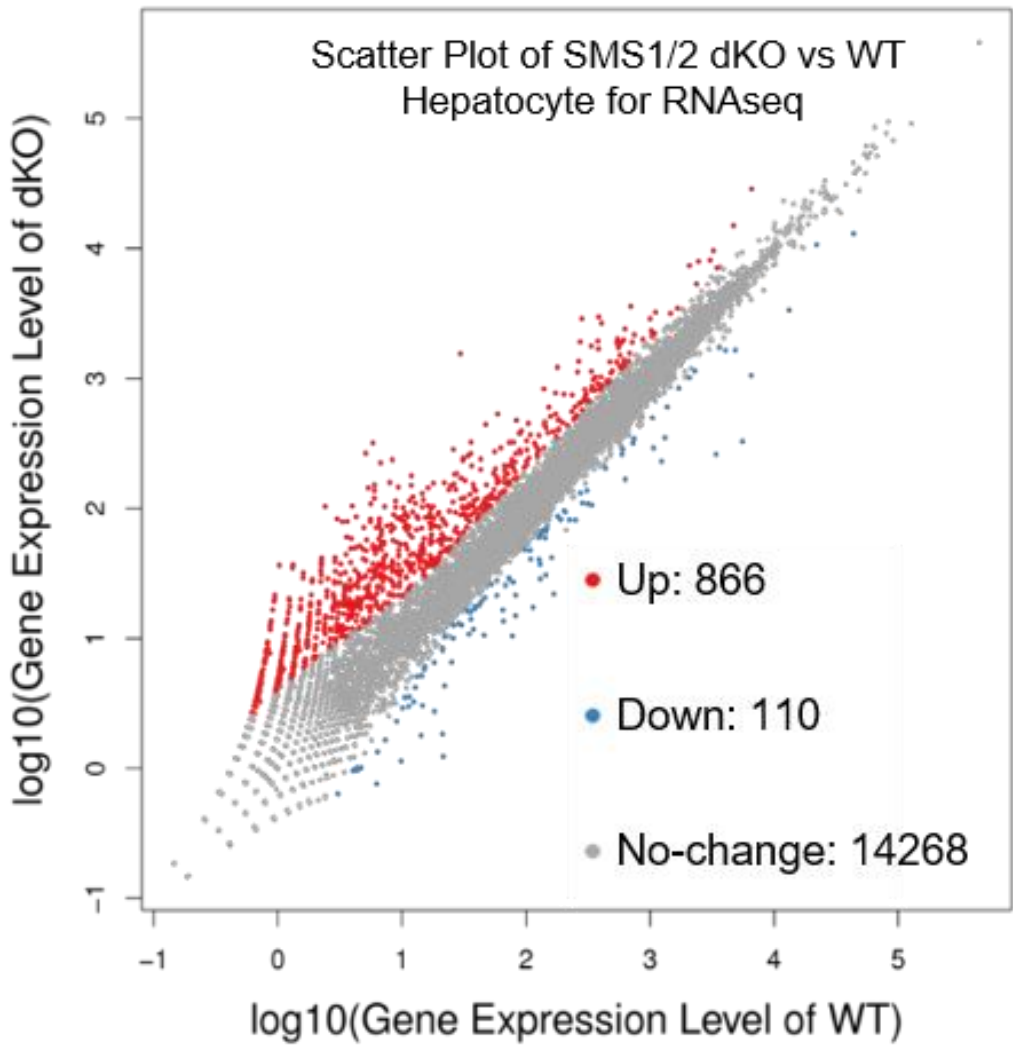

Supplement: mmc1.pdf [file mmc1.pdf]
